# Supplementary material
Source: PubMed Central journal article supplement (PMC2705044)
Supplement: pp.109.138420_1.pdf [file pp.109.138420_1.pdf]

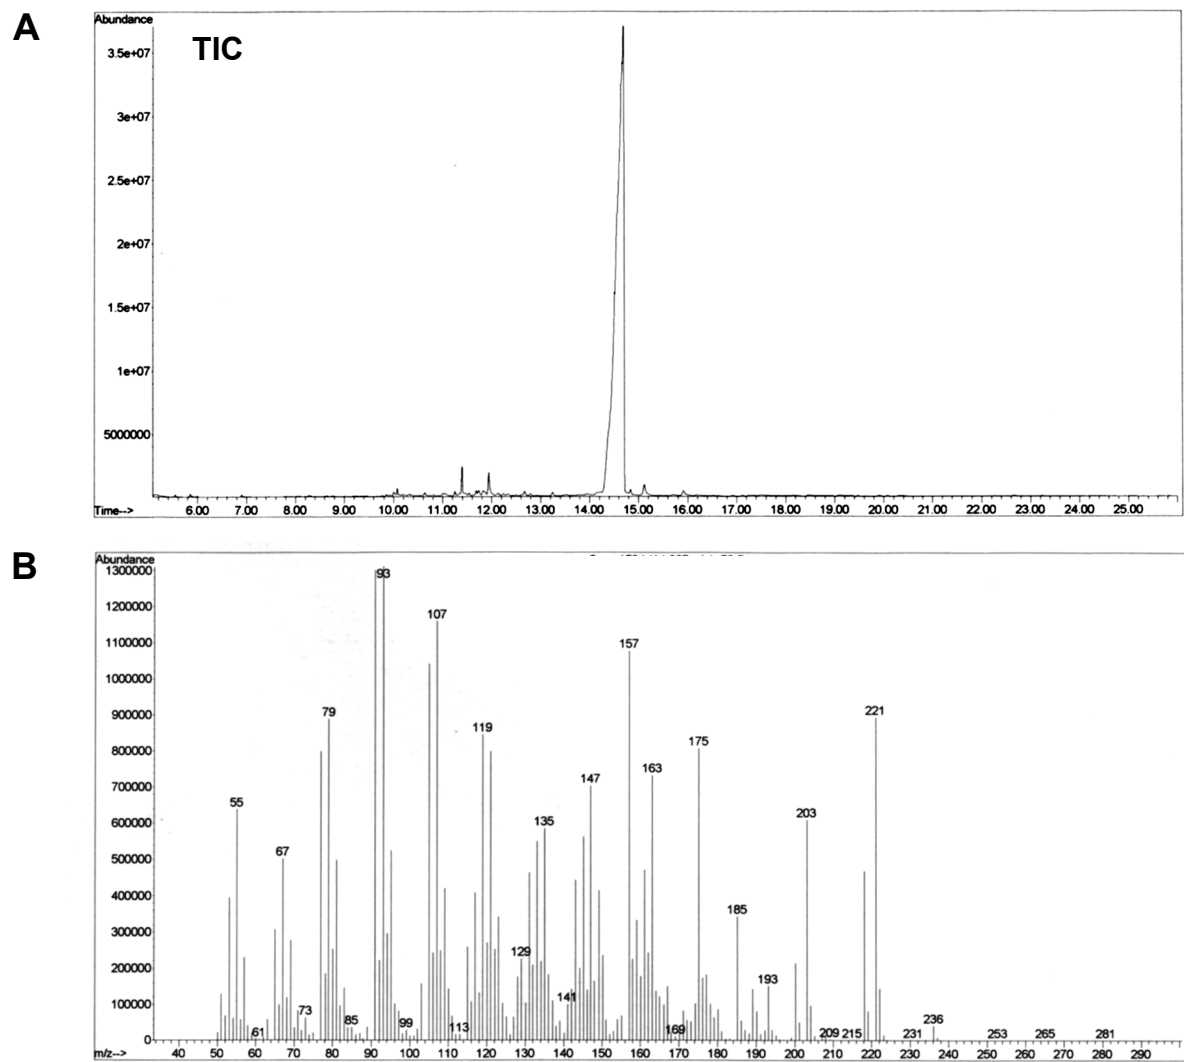

**Supplemental Figure S1.** GC-MS analysis of capsidiol produced by *N. plumbaginifolia* following elicitor treatments or infection with *B. cinerea*. Total ion current chromatogram (TIC) (A) and mass spectrum (B) of capsidiol (retention time 14.66 and molecular ion at  $m/z$  236) obtained from elicited or infected *N. plumbaginifolia* plants.
