# Supplementary material
Source: PubMed Central journal article supplement (PMC2705044)
Supplement: pp.109.138420_2.pdf [file pp.109.138420_2.pdf]

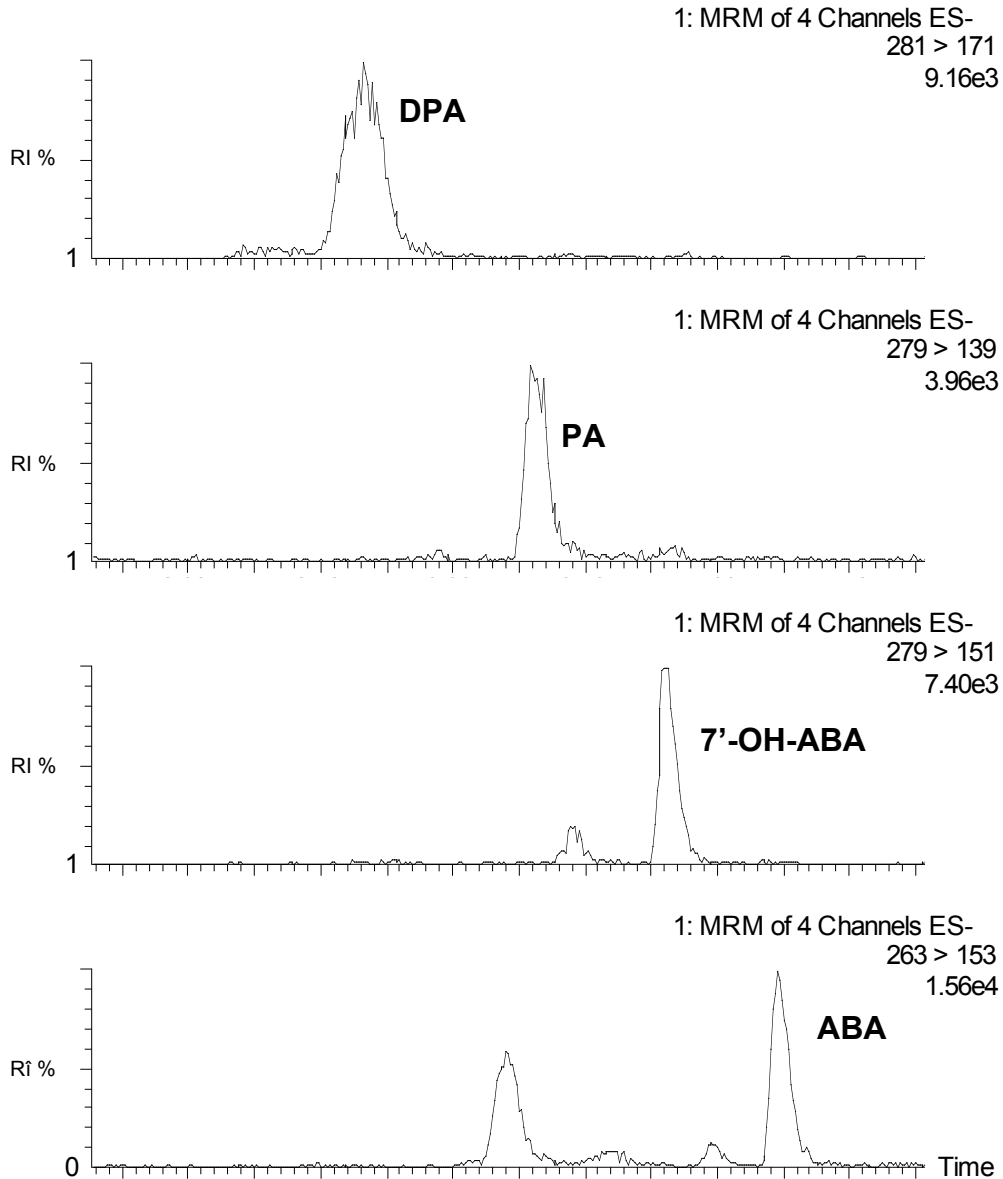

**Supplemental Figure S2.** Ultra-performance liquid chromatography coupled with tandem mass spectrometry (UPLC-MS/MS) analysis using multiple reaction monitoring (MRM) of leaf disc extract from WT *N. plumbaginifolia* overexpressing *NpABAH*. ABAH products were analyzed using 30 discs, following incubation with exogenous ABA (25  $\mu$ M) for 20 h. The MRM chromatograms, were acquired by monitoring the transition of  $m/z$  263>153 for abscisic acid (ABA), 279> 151 for 7'-hydroxy abscisic acid (7'-OH-ABA), 279> 139 for phaseic acid (PA), and 281>171 for dihydrophaseic (DPA). The cone voltage and the collision energy were 25V and 22eV. The abbreviations refer to the relative intensity (RI).
